# Supplementary material for: Recovery of Water Homeostasis in Adenine-Induced Kidney Disease Is Mediated by Increased AQP2 Membrane Targeting
Source: MDPI journal article supplement (doi:10.3390/ijms25063447), 2024-03-19
Supplement: s1 [file s1]

Table S1. Sequence of primers for quantitative reverse-transcriptase polymerase chain reaction.

| Target gene                   | Direction | Sequence (5' to 3')         |
|-------------------------------|-----------|-----------------------------|
| <i>Gapdh</i> (GAPDH)          | Sense     | TAAAGGGCATCCTGGGCTACACT     |
|                               | Antisense | TTACTCCTTGGAGGCCATGTAGG     |
| <i>Fn1</i> (FN)               | Sense     | AATGGAAAAGGGGAATGGAC        |
|                               | Antisense | CTCGGTTGTCCTTCTTGCTC        |
| <i>Col1a1</i> (COL1A1)        | Sense     | CAATGGTGAGACGTGGAAACC       |
|                               | Antisense | ACAGTCCAGTTCTTCATTGCA       |
| <i>Il1b</i> (IL-1 $\beta$ )   | Sense     | CAGGCAGGCAGTATCACTCA        |
|                               | Antisense | TGTCCTCATCCTGGAAGGTC        |
| <i>Il6</i> (IL-6)             | Sense     | GATGCTACCAAACCTGGATATAATC   |
|                               | Antisense | GGTCCTTAGCCACTCCTTCTGTG     |
| <i>Ccl2</i> (MCP1)            | Sense     | CAAGAAGGAATGGGTCCAGA        |
|                               | Antisense | GTGCTGAAGACCTTAGGGCA        |
| <i>Tgfb</i> (TGF- $\beta$ )   | Sense     | ACCGGAGAGCCCTGGATAC         |
|                               | Antisense | AGGGTCCCAGACAGAAGTTG        |
| <i>Havcr1</i> (KIM-1)         | Sense     | CGGTACAACTTAAAGGGGCA        |
|                               | Antisense | GACGTGTGGAATCTCTGGT         |
| <i>Aqp1</i> (AQP1)            | Sense     | GTCCAGGACAACGTGAAGGT        |
|                               | Antisense | ACACACTGGGCGATGATGTA        |
| <i>Aqp2</i> (AQP2)            | Sense     | CTTCCTTCGAGCTGCCTTC         |
|                               | Antisense | CATTGTTGTGGAGAGCATTGAC      |
| <i>Aqp3</i> (AQP3)            | Sense     | TGTGTGTACTGGCCATCG TT       |
|                               | Antisense | GTTGACGGCATAGCCAGAAT        |
| <i>Aqp4</i> (AQP4)            | Sense     | TGGTGTTCACTATTTTTGCC        |
|                               | Antisense | GATCAAGTCTTCCGTCTCCA        |
| <i>Tnf</i> (TNF- $\alpha$ )   | Sense     | AGGCTGCCCCGACTACGT          |
|                               | Antisense | GACTTTCTCCTGGTATGAGATAGCAAA |
| <i>Acta2</i> ( $\alpha$ -SMA) | Sense     | CTGACAGAGGCACCACTGAA        |
|                               | Antisense | CATCTCCAGAGTCCAGCACA        |
| <i>Slc12a1</i> (NKCC2)        | Sense     | AGTGCGCCCAAAGTATTCCA        |
|                               | Antisense | CAATGACATTCAGCTCGGCG        |
| <i>Slc9a3</i> (NHE3)          | Sense     | TCGGCAGGAGTACAAGCATC        |
|                               | Antisense | AGCTTGGCCGCCTTCTTATT        |
| <i>mMrgA9</i> (Ade2R)         | Sense     | CACGTTCTCCTCACCCAACA        |
|                               | Antisense | CCCAGATTGCAGCACACATG        |

Abbreviations: GAPDH, Glyceraldehyde 3-phosphate dehydrogenase; FN, Fibronectin; Col1a1, Collagen type 1 alpha 1; IL, Interleukin; MCP, Monocyte chemoattractant protein; TGF, Transforming growth factor; KIM, Kidney injury molecule; AQP, Aquaporin; TNF, Tumour necrosis factor; SMA, Smooth muscle actin; NKCC, Sodium-Potassium-Chloride Cotransporter; NHE, Sodium-hydrogen exchanger; Ade2R, Adenine receptor.

Table S2. Antibodies used for immunoblotting, immunohistochemistry, and immunofluorescence.

| Target                      | Source | Dilution | Method               | Manufacturer                          |
|-----------------------------|--------|----------|----------------------|---------------------------------------|
| <b>Primary antibodies</b>   |        |          |                      |                                       |
| $\alpha$ -SMA               | Mouse  | 1:500    | Immunofluorescence   | ab215368; Abcam                       |
|                             |        | 1:250    | Immunoblotting       | M0851; DAKO                           |
| FN                          | Rabbit | 1:50     | Immunohistochemistry | ab2413; Abcam                         |
|                             |        | 1:1000   | Immunoblotting       |                                       |
| PDGFR $\beta$               | Rabbit | 1:400    | Immunofluorescence   | ab32570; Abcam                        |
| KIM-1                       | Goat   | 1:400    | Immunofluorescence   | AF1817, R&D Systems                   |
| AQP1                        | Rabbit | 1:200    | Immunofluorescence   | AB2219; Sigma-Aldrich                 |
| AQP2                        | Mouse  | 1:200    | Immunofluorescence   | sc-515770; Santa Cruz                 |
| AQP3                        | Rabbit | 1:1000   | Immunohistochemistry | Biotechnology<br>AQP-003; Alamone     |
| AQP4                        | Rabbit | 1:4000   | Immunohistochemistry | AQP-003; Alamone                      |
| NKCC2                       | Rabbit | 1:2000   | Immunofluorescence   | 38436S; Cell Signalling<br>Technology |
| <b>Secondary antibodies</b> |        |          |                      |                                       |
| Rabbit                      | Donkey | 1:500    | Immunofluorescence   | Alexa Fluor 647; Invitrogen           |
| Goat                        | Donkey | 1:500    | Immunofluorescence   | Alexa Fluor 680; Invitrogen           |
| Mouse                       | Donkey | 1:500    | Immunofluorescence   | Alexa Fluor 488; Invitrogen           |
| Rabbit                      | Goat   | 1:4000   | Immunoblotting       | Alexa Fluor 447; Dako                 |
| Mouse                       | Goat   | 1:4000   | Immunoblotting       | Alexa Fluor 448; Dako                 |

Abbreviations: SMA, Smooth muscle actin; AQP, Aquaporin; FN, Fibronectin; KIM, Kidney injury molecule; NKCC, Sodium-Potassium-Chloride Cotransporter; PDGFR, Platelet derived growth factor receptor.
